# Supplementary material
Source: Research Square preprint supplement (doi:10.21203/rs.3.rs-10162012/v1)
Supplement: Supplementary file 1 [file 550e09f96a3b1e9bdd157716.docx]

**Additional File 1**

*Study Questionnaire (English Language Version)*

**Exploring the Knowledge, Attitudes and Practices of Medical Students towards Lifestyle Modifications: A Cross-Sectional Study**

*Companion file to: “Knowledge–Practice Gap and Determinants of Healthy Lifestyle Behaviors Among Medical Students: A Cross-Sectional Study from North India”*

This file contains the Participant Information Sheet and the full study questionnaire, developed by the authors specifically for this study and administered electronically via Google Forms. The questionnaire is reproduced in full below, including all response options and built-in skip logic, exactly as presented to participants. Question numbering follows the original electronic instrument.

**Participant Information Sheet**

**Title of Study:** *“Exploring the Knowledge, Attitudes and Practices of Medical Students towards Lifestyle Modifications: A Cross-Sectional Study”*

**Introduction:** You are invited to participate in a research study conducted by Prisha as part of a study on the attitudes and practices of medical students towards lifestyle modifications. The purpose of this study is to understand your perspectives, behaviors, and beliefs regarding lifestyle modifications, including exercise, diet, and stress management. The findings from this study will contribute to improving medical education and promoting healthier lifestyles among medical students.

**Study Procedures:** If you agree to participate, you will be asked to complete a questionnaire/Google Form that includes questions about your attitudes towards lifestyle modifications, your current practices related to exercise, diet, stress management, and other lifestyle behaviors. The questionnaire will take approximately 15–20 minutes to complete. Your participation is entirely voluntary, and you may withdraw at any time without providing a reason.

**Confidentiality:** All information collected during the study will be kept strictly confidential and will only be accessible to the research team. Your responses will be anonymized and any identifying information will be removed to ensure your privacy. The data collected will be used for research purposes only and will be reported in an aggregated and de-identified manner.

**Potential Risks:** Participation in this study poses minimal risks. Some questions in the questionnaire may ask about personal habits or beliefs, which you may choose not to answer if you feel uncomfortable. If you experience any distress while participating, please inform the research team.

**Benefits of Participation:** By participating in this study, you will contribute to the understanding of the attitudes and practices of medical students towards lifestyle modifications. The findings may help improve medical education and promote healthier behaviors among future healthcare professionals.

**Contact Information:** If you have any questions or concerns about the study, you may contact Prisha (Mobile: +91 7009303093; Email: prisha.ind@gmail.com). If you have any ethical concerns about the study, you may contact the study guide, Dr. Naresh Jyoti (Mobile: +91 8708649738; Email: adeshdms@gmail.com).

**Consent:** Your participation in this study is voluntary, and you have the right to withdraw at any time without penalty. By completing and submitting the questionnaire, you indicate your informed consent to participate in this study.

*Thank you for considering participating in this study. Your valuable insights and contributions are greatly appreciated.*

**Part 1. Participant Information Sheet & Consent**

**1. I have read the information provided in the Participant Information Sheet for the study entitled: “Exploring the Knowledge, Attitudes and Practices of Medical Students towards Lifestyle Modifications: A Cross-Sectional Study”, and I understand the purpose, procedures, and potential risks and benefits of participating in the study. I have had the opportunity to ask questions, and all my questions have been answered to my satisfaction. I voluntarily agree to participate in the study and understand that I may withdraw at any time without penalty. ***

○ Yes, I consent to participate in this study.

○ No, I do not want to participate in this study.

**Part 2. Demographic Information**

*Data so collected will be anonymised and no personal information will be stored.*

**2. Age (in years) — open numeric response ***

**3. Gender ***

○ Male

○ Female

**4. Geographical background ***

○ Rural

○ Urban

**5. MBBS Admission Batch / Year ***

○ 2019

○ 2020

○ 2021

○ 2022

○ 2023

**Part 3. Personal History of Chronic Disease**

**6. Do you have a personal history of chronic diseases like Hypertension / Diabetes / Obesity / Asthma (COPD)? ***

○ Yes

*→ If Yes → continue to Q7*

○ No

*→ If No → skip to Q27 (Family History section)*

***Hypertension — Personal History***

**7. Do you have any personal history of HYPERTENSION? ***

○ Yes

*→ Continue to Q8*

○ No

*→ Skip to Q12*

**8. Duration of illness (open response) ***

**9. Are you taking any medication for HYPERTENSION? ***

○ Yes

○ No

**10. Antihypertensive medication / Treatment COMPLIANCE ***

○ Miss out dose

○ Take less dose

○ Take as prescribed

**11. HYPERTENSION: Control status ***

○ Controlled

○ Uncontrolled

***Diabetes Mellitus — Personal History***

**12. Do you have any personal history of DIABETES? ***

○ Yes

*→ Continue to Q13*

○ No

*→ Skip to Q17*

**13. Duration of illness (open response) ***

**14. Are you taking any medication for DIABETES? ***

○ Yes

○ No

**15. Antidiabetic medication / Treatment COMPLIANCE ***

○ Miss out dose

○ Take less dose

○ Take as prescribed

**16. DIABETES: Control status ***

○ Controlled

○ Uncontrolled

***Obesity — Personal History***

**17. Do you have any personal history of OBESITY? ***

○ Yes

*→ Continue to Q18*

○ No

*→ Skip to Q22*

**18. Duration of illness (open response) ***

**19. Are you taking any medication for OBESITY? ***

○ Yes

○ No

**20. Antiobesity medication / Treatment COMPLIANCE ***

○ Miss out dose

○ Take less dose

○ Take as prescribed

**21. OBESITY: Control status ***

○ Controlled

○ Uncontrolled

***Asthma / COPD — Personal History***

**22. Do you have any personal history of ASTHMA / COPD? ***

○ Yes

*→ Continue to Q23*

○ No

*→ Skip to Q27*

**23. Duration of illness (open response) ***

**24. Are you taking any medication for ASTHMA / COPD? ***

○ Yes

○ No

**25. Antiasthmatic or COPD medication / Treatment COMPLIANCE ***

○ Miss out dose

○ Take less dose

○ Take as prescribed

**26. ASTHMA / COPD: Control status ***

○ Controlled

○ Uncontrolled

**Part 4. Family History of Chronic Disease (Parent / Sibling / Children)**

**27. Do you have a Family history of chronic diseases like Hypertension / Diabetes / Obesity / Asthma (COPD) in any of Parent / Sibling / Children? ***

○ Yes

*→ Continue to Q28*

○ No

*→ Skip to Q48 (Stress section)*

***Hypertension — Family History***

**28. Do they have any history of HYPERTENSION? ***

○ Yes

*→ Continue to Q29*

○ No

*→ Skip to Q33*

**29. Duration of illness (open response) ***

**30. Are they taking any medication for HYPERTENSION? ***

○ Yes

○ No

**31. Antihypertensive medication / Treatment COMPLIANCE ***

○ Miss out dose

○ Take less dose

○ Take as prescribed

**32. HYPERTENSION: Control status ***

○ Controlled

○ Uncontrolled

***Diabetes Mellitus — Family History***

**33. Do they have any history of DIABETES? ***

○ Yes

*→ Continue to Q34*

○ No

*→ Skip to Q38*

**34. Duration of illness (open response) ***

**35. Are they taking any medication for DIABETES? ***

○ Yes

○ No

**36. Antidiabetic medication / Treatment COMPLIANCE ***

○ Miss out dose

○ Take less dose

○ Take as prescribed

**37. DIABETES: Control status ***

○ Controlled

○ Uncontrolled

***Obesity — Family History***

**38. Do they have any personal history of OBESITY? ***

○ Yes

*→ Continue to Q39*

○ No

*→ Skip to Q43*

**39. Duration of illness (open response) ***

**40. Are they taking any medication for OBESITY? ***

○ Yes

○ No

**41. Antiobesity medication / Treatment COMPLIANCE ***

○ Miss out dose

○ Take less dose

○ Take as prescribed

**42. OBESITY: Control status ***

○ Controlled

○ Uncontrolled

***Asthma / COPD — Family History***

**43. Do they have any personal history of ASTHMA / COPD? ***

○ Yes

*→ Continue to Q44*

○ No

*→ Skip to Q48*

**44. Duration of illness (open response) ***

**45. Are they taking any medication for ASTHMA / COPD? ***

○ Yes

○ No

**46. Antiasthmatic or COPD medication / Treatment COMPLIANCE ***

○ Miss out dose

○ Take less dose

○ Take as prescribed

**47. ASTHMA / COPD: Control status ***

○ Controlled

○ Uncontrolled

**Part 5. Stress in Everyday Life**

**48. Do you experience stress in your everyday life? ***

○ Yes

*→ Continue to Q49*

○ No

*→ Skip to Q59 (Tension Headache section)*

*Questions 49–57: Please grade each stressor on a scale of 0–10, where 0 = No stress, 1–4 = Mild, 5–7 = Moderate, 8–10 = Severe.*

**49. Increased academic burden ***

*Scale: 0 (No stress) — 1–4 (Mild) — 5–7 (Moderate) — 8–10 (Severe stress)*

**50. Fear of failure in academics ***

*Scale: 0 (No stress) — 1–4 (Mild) — 5–7 (Moderate) — 8–10 (Severe stress)*

**51. Maintaining compulsory attendance ***

*Scale: 0 (No stress) — 1–4 (Mild) — 5–7 (Moderate) — 8–10 (Severe stress)*

**52. Balancing a social, academic and healthy lifestyle ***

*Scale: 0 (No stress) — 1–4 (Mild) — 5–7 (Moderate) — 8–10 (Severe stress)*

**53. Personal stressors ***

*Scale: 0 (No stress) — 1–4 (Mild) — 5–7 (Moderate) — 8–10 (Severe stress)*

**54. Fear of getting admission in PG ***

*Scale: 0 (No stress) — 1–4 (Mild) — 5–7 (Moderate) — 8–10 (Severe stress)*

**55. Lack of adequate sleep ***

*Scale: 0 (No stress) — 1–4 (Mild) — 5–7 (Moderate) — 8–10 (Severe stress)*

**56. Incompatibility with room mate ***

*Scale: 0 (No stress) — 1–4 (Mild) — 5–7 (Moderate) — 8–10 (Severe stress)*

**57. Any other (if yes provide details) ***

*Scale: 0 (No stress) — 1–4 (Mild) — 5–7 (Moderate) — 8–10 (Severe stress)*

**58. Any other (if yes provide details) — open-ended response**

*Optional; respondents could skip this item.*

**Part 6. Tension Headache**

**59. Do you experience tension headache? ***

○ Yes

*→ Continue to Q60*

○ No

*→ Skip to Q62 (Knowledge section)*

**60. Frequency of episodes of tension headache per month — open numeric response ***

**61. Please grade severity of your tension headache on a scale of 1–10 ***

*Headache grades: Mild (1–4), Moderate (5–7), Severe (8–10)*

**Part 7. Knowledge**

*Please indicate your level of agreement with the following statements on a 5-point Likert scale: 1 = Strongly Agree, 2 = Agree, 3 = Undecided, 4 = Disagree, 5 = Strongly Disagree.*

**62. Regular exercise is beneficial for overall health and well-being. ***

*1 = Strongly Agree — 2 = Agree — 3 = Undecided — 4 = Disagree — 5 = Strongly Disagree*

**63. A balanced diet is essential for maintaining good health. ***

*1 = Strongly Agree — 2 = Agree — 3 = Undecided — 4 = Disagree — 5 = Strongly Disagree*

**64. A healthy diet includes a variety of fruits, vegetables, whole grains, lean proteins, and healthy fats. ***

*1 = Strongly Agree — 2 = Agree — 3 = Undecided — 4 = Disagree — 5 = Strongly Disagree*

**65. Physical activity guidelines recommend at least 150 minutes of moderate-intensity exercise per week. ***

*1 = Strongly Agree — 2 = Agree — 3 = Undecided — 4 = Disagree — 5 = Strongly Disagree*

**66. Stress management techniques are important for maintaining mental health. ***

*1 = Strongly Agree — 2 = Agree — 3 = Undecided — 4 = Disagree — 5 = Strongly Disagree*

**67. Limiting the consumption of sugary drinks is beneficial for maintaining good health. ***

*1 = Strongly Agree — 2 = Agree — 3 = Undecided — 4 = Disagree — 5 = Strongly Disagree*

**68. Tobacco use has significant impact on health. ***

*1 = Strongly Agree — 2 = Agree — 3 = Undecided — 4 = Disagree — 5 = Strongly Disagree*

**69. Engaging in regular exercise can reduce the risk of chronic diseases such as cardiovascular diseases and diabetes. ***

*1 = Strongly Agree — 2 = Agree — 3 = Undecided — 4 = Disagree — 5 = Strongly Disagree*

**70. Adequate sleep is important for overall health and well-being. ***

*1 = Strongly Agree — 2 = Agree — 3 = Undecided — 4 = Disagree — 5 = Strongly Disagree*

**71. Chronic stress can negatively impact physical and mental health. ***

*1 = Strongly Agree — 2 = Agree — 3 = Undecided — 4 = Disagree — 5 = Strongly Disagree*

**72. Maintaining a healthy weight is important for reducing the risk of various diseases. ***

*1 = Strongly Agree — 2 = Agree — 3 = Undecided — 4 = Disagree — 5 = Strongly Disagree*

**73. Mindfulness-based techniques can help manage stress and improve well-being. ***

*1 = Strongly Agree — 2 = Agree — 3 = Undecided — 4 = Disagree — 5 = Strongly Disagree*

**Part 8. Attitudes**

*Please indicate your level of agreement with the following statements on a 5-point Likert scale: 1 = Strongly Agree, 2 = Agree, 3 = Undecided, 4 = Disagree, 5 = Strongly Disagree.*

**74. I believe that lifestyle modifications, including exercise, diet, and stress management, are essential for physicians’ overall well-being. ***

*1 = Strongly Agree — 2 = Agree — 3 = Undecided — 4 = Disagree — 5 = Strongly Disagree*

**75. I feel confident in my ability to make positive changes in my lifestyle. ***

*1 = Strongly Agree — 2 = Agree — 3 = Undecided — 4 = Disagree — 5 = Strongly Disagree*

**76. I perceive exercise as a burden rather than a source of enjoyment. ***

*1 = Strongly Agree — 2 = Agree — 3 = Undecided — 4 = Disagree — 5 = Strongly Disagree*

**77. I perceive stress management techniques as beneficial for maintaining mental well-being. ***

*1 = Strongly Agree — 2 = Agree — 3 = Undecided — 4 = Disagree — 5 = Strongly Disagree*

**78. I believe that lifestyle modifications can help prevent the onset of chronic diseases. ***

*1 = Strongly Agree — 2 = Agree — 3 = Undecided — 4 = Disagree — 5 = Strongly Disagree*

**79. I believe that healthy eating can be enjoyable and satisfying. ***

*1 = Strongly Agree — 2 = Agree — 3 = Undecided — 4 = Disagree — 5 = Strongly Disagree*

**80. I am motivated to engage in regular physical activity. ***

*1 = Strongly Agree — 2 = Agree — 3 = Undecided — 4 = Disagree — 5 = Strongly Disagree*

**81. I believe that patients are more likely to adhere to lifestyle recommendations when given by a physician who practices those behaviors. ***

*1 = Strongly Agree — 2 = Agree — 3 = Undecided — 4 = Disagree — 5 = Strongly Disagree*

**82. I am willing to make necessary changes in my lifestyle to improve my health. ***

*1 = Strongly Agree — 2 = Agree — 3 = Undecided — 4 = Disagree — 5 = Strongly Disagree*

**Part 9. Practices**

**83. How often do you engage in physical activity or exercise per week? ***

○ None

○ 1–2 days

○ 3–4 days

○ 5 or more days

**84. On average, how many servings of fruits and vegetables do you consume per day? ***

○ None

○ 1–2 servings

○ 3–4 servings

○ 5 or more servings

**85. How frequently do you consume sugary drinks (e.g., soda, sweetened beverages)? ***

○ Daily

○ 2–3 times per week

○ Once a week

○ Rarely / Never

**86. How frequently do you consume junk food (e.g., fast food / oily snacks)? ***

○ Daily

○ 2–3 times per week

○ Once a week

○ Rarely / Never

**87. How important do you consider stress management in your daily life? ***

*1 = Not important — 5 = Very Important*

**88. How often do you engage in activities that promote mental well-being (e.g., meditation, mindfulness, hobbies)? ***

○ Rarely / Never

○ Occasionally (once a month)

○ Sometimes (once a week)

○ Regularly (multiple times a week)

**89. How do you manage stress? ***

*Multiple selection permitted; respondents could also specify under ‘Other’.*

☐ Practice Yoga / workout

☐ Go to sleep

☐ Pursue hobbies

☐ Listen to music

☐ Take medication

☐ Other (please specify)

**90. How well do you feel you manage stress? ***

*1 = Poor — 10 = Good*

**91. Do you prioritize adequate sleep? ***

○ Yes

○ No

**92. If no, what are the main barriers to getting adequate sleep? (open-ended response)**

*Optional; skipped if the response to Q91 was Yes.*

**93. How many hours of sleep do you aim for per night? (open numeric response) ***

**94. Daily self-study hours? (open numeric response) ***

**95. Average daily screen exposure time, in hours (open numeric response) ***

**96. Participation in co-curricular activities? ***

○ Daily

○ Weekly

○ Sometimes

○ Rarely

**97. How often do you take breakfast? ***

○ Daily

○ Sometimes

○ Don’t like to eat

○ Miss due to lack of time

**98. Compulsion habits? ***

*Multiple selection permitted.*

☐ Smoking

☐ Alcohol

☐ Caffeinated drinks

☐ Recreational drugs

☐ None

**99. Change in your weight after joining Medical College? ***

○ Increased

○ Decreased

○ No Change

**100. How would you rate your current level of satisfaction with your lifestyle habits? ***

*1 = Not satisfactory — 10 = Very satisfactory*

**101. Have you made any significant changes to your diet or exercise habits in the past year? ***

○ Yes

○ No

**102. If yes, please briefly describe the changes you made. (open-ended response)**

*Optional; skipped if the response to Q101 was No.*

**Part 10. Barriers & Facilitators**

*Multiple selection permitted for both items below.*

**103. What are the main barriers you face in adopting or maintaining healthy lifestyle habits? ***

☐ Lack of time

☐ Lack of motivation

☐ Lack of knowledge or guidance

☐ Financial constraints

☐ Social pressures

☐ Other (please specify)

**104. What factors or strategies facilitate your ability to maintain healthy lifestyle habits? ***

☐ Supportive social environment

☐ Setting specific goals

☐ Time management strategies

☐ Access to resources (e.g., gym, healthy food options)

☐ Accountability (e.g., tracking progress, having a workout buddy)

☐ Other (please specify)

*End of questionnaire.*
